# Supplementary material for: microRNA-29b mediates fibrotic induction of human xylosyltransferase-I in human dermal fibroblasts via the Sp1 pathway
Source: PubMed Central journal article supplement (PMC6290791; doi:10.1038/s41598-018-36217-2), 2018-12-12

**microRNA-29b mediates fibrotic induction of human xylosyltransferase-I in human dermal fibroblasts via the Sp1 pathway**

Lara Riedel<sup>a</sup>, Bastian Fischer<sup>a</sup>, Thanh-Diep Ly<sup>a</sup>, Doris Hendig<sup>a</sup>, Joachim Kuhn<sup>a</sup>, Cornelius Knabbe<sup>a</sup>  
and Isabel Faust<sup>a\*</sup>

<sup>a</sup>Institut für Laboratoriums- und Transfusionsmedizin, Herz- und Diabeteszentrum Nordrhein-Westfalen, Universitätsklinik der Ruhr-Universität Bochum, Georgstraße 11, 32545 Bad Oeynhausen, Germany

**\*Corresponding author:**

Dr. rer. nat. Isabel Faust

Institut für Laboratoriums- und Transfusionsmedizin

Herz- und Diabeteszentrum Nordrhein-Westfalen

Universitätsklinik der Ruhr-Universität Bochum

Georgstraße 11, 32545 Bad Oeynhausen, Germany

Tel.: (+49) 5731-97-1234, Fax: (+49) 5731-97-1959

E-mail: ifaust@hdz-nrw.de

Supplementary information

Figure S1

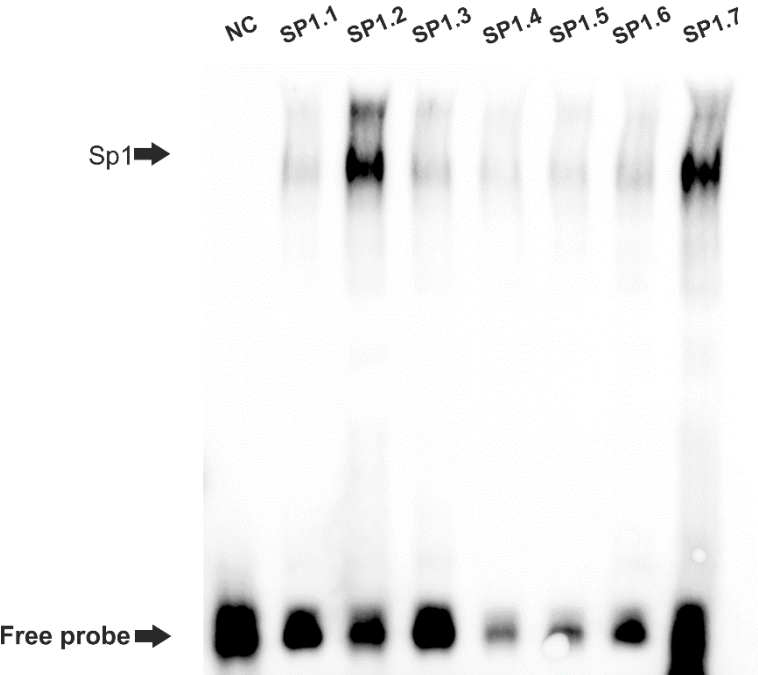

Figure S2

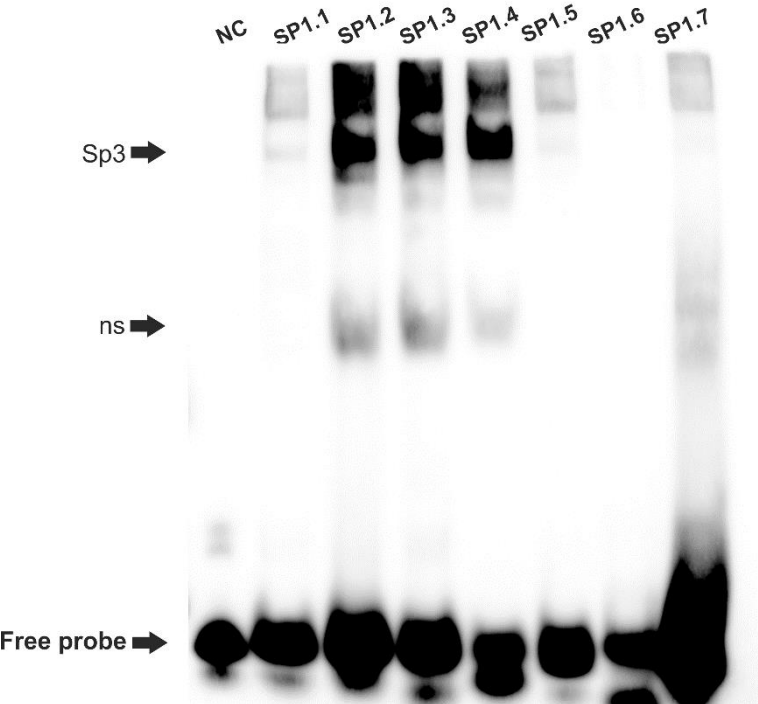

Supplement: 41598_2018_36217_MOESM1_ESM.pdf [file 41598_2018_36217_MOESM1_ESM.pdf]
